# Supplementary material for: Uterine NK Cells Are Critical in Shaping DC Immunogenic Functions Compatible with Pregnancy Progression
Source: PLoS One. 2012 Oct 8;7(10):e46755. doi: 10.1371/journal.pone.0046755 (PMC3466312; doi:10.1371/journal.pone.0046755)
Supplement: Table S3 — Selected gene sets enriched towards upregulated genes in ↑DCØNK found by GSEA. (XLSX) [file pone.0046755.s003.xlsx]

## Sheet: Table S3
Table S3: Selected gene sets enriched towards upregulated genes in ↑DCØNK found by GSEA.
Gene set	Abstract	Gene set size	ES	NES	FDR q-value	FWER p-value	Rank at max	Genes in top 500	% of gene set	Gene symbols
Le Naour_Dendritic cell maturation	Dendritic cells (DCs) are antigen-presenting cells that play a major role in initiating primary immune responses. We have utilized two independent approaches, DNA microarrays and proteomics, to analyze the expression profile of human CD14(+) blood monocytes and their derived DCs. Analysis of gene expression changes at the RNA level using oligonucleotide microarrays complementary to 6300 human gen…	93	0.559815	3.9157	0	0	4100	18	19.3548	Ampd3 Alg3 Bcat1 C5ar1 Irf7 Tlr1 Lgmn C3ar1 Anpep Fyb Cybb Ptafr Htra1 Cd44 Adam10 Cytip Cd14 Tnfrsf1b
Ichiba_Graft versus host disease 35d upregulated	The liver, skin, and gastrointestinal tract are major target organs of acute graft-versus-host disease (GVHD), the major complication of allogeneic bone marrow transplantation (BMT). In order to gain a better understanding of acute GVHD in the liver, we compared the gene expression profiles of livers after experimental allogeneic and syngeneic BMT using oligonucleotide microarray. At 35 days afte…	145	0.529066	3.71589	0	0	2655	21	14.4828	Lrg1 Gp49a Ctss Lgmn Lyz2 Sirpa Apbb1ip Pdk3 Irgm1 Atp1b3 Ear2 Cybb Pira1 Mpeg1 Ms4a6c Gbp3 Fcgr1 Cytip Cd14 Qsox1 Lgals3
ES enrichment score
NES normalized enrichment score
